# Supplementary material
Source: Springer Nature journal article supplement (https://www.springermedizin.de/resource/supplementary/12967_2009_469_MOESM1_ESM.pdf/9576608)

A

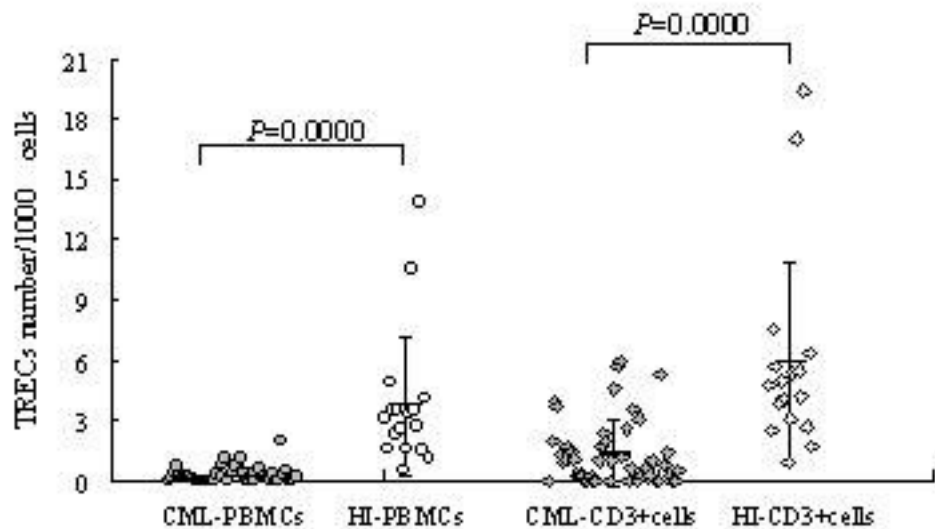

B

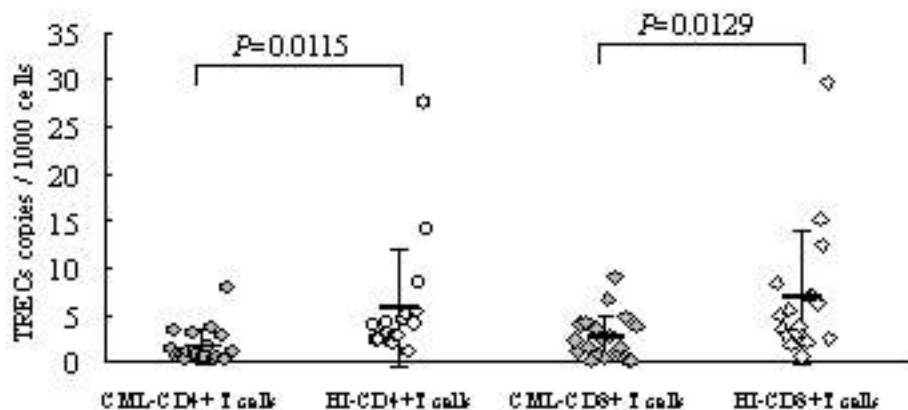

Supplement: MOESM1 [file 9576608]
